# Supplementary material for: Non-classical diffusion in ionic liquids
Source: Royal Society of Chemistry journal article supplement (doi:10.1039/c1cp20373h), 2011-01-01
Supplement: c1cp20373h.pdf [file c1cp20373h.pdf]

## Supporting Information for Non-Classical Diffusion in Ionic Liquids

Alasdair W. Taylor,<sup>a</sup> Peter Licence<sup>\*a</sup> and Andrew P. Abbott<sup>\*b</sup>

<sup>a</sup>School of Chemistry, The University of Nottingham, Nottingham NG7 2RD, UK

<sup>b</sup>Department of Chemistry, University of Leicester, Leicester LE1 7RH, UK

\*To whom correspondence should be addressed:

[peter.licence@nottingham.ac.uk](mailto:peter.licence@nottingham.ac.uk)

Tel: +44 115 8466176

[FcC<sub>1</sub>C<sub>1</sub>Im][Tf<sub>2</sub>N] in [C<sub>4</sub>C<sub>1</sub>Im][Tf<sub>2</sub>N]

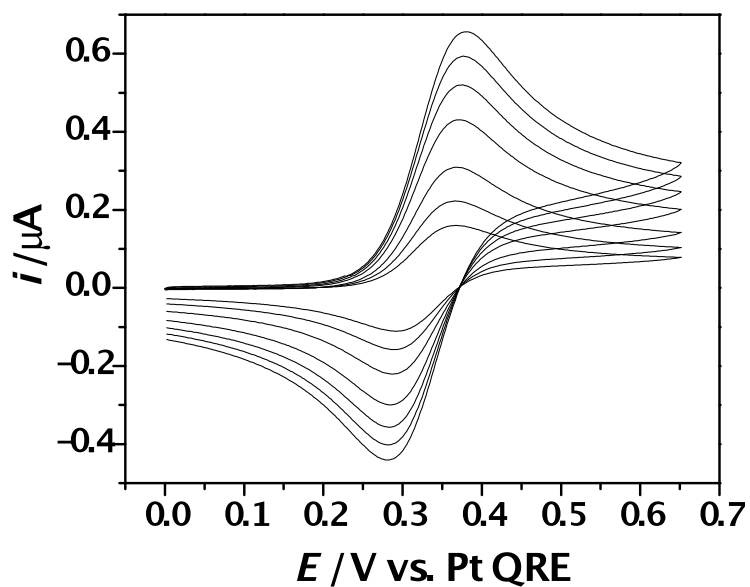

**Figure S1** CVs obtained at WE1 in a 4.59 mM solution of [FcC<sub>1</sub>C<sub>1</sub>Im][Tf<sub>2</sub>N] in [C<sub>4</sub>C<sub>1</sub>Im][Tf<sub>2</sub>N],  $v$  ranged from 25-500  $mV s^{-1}$ ,  $T = 298 K$ ,  $p = 5 \times 10^{-6}$  mbar.

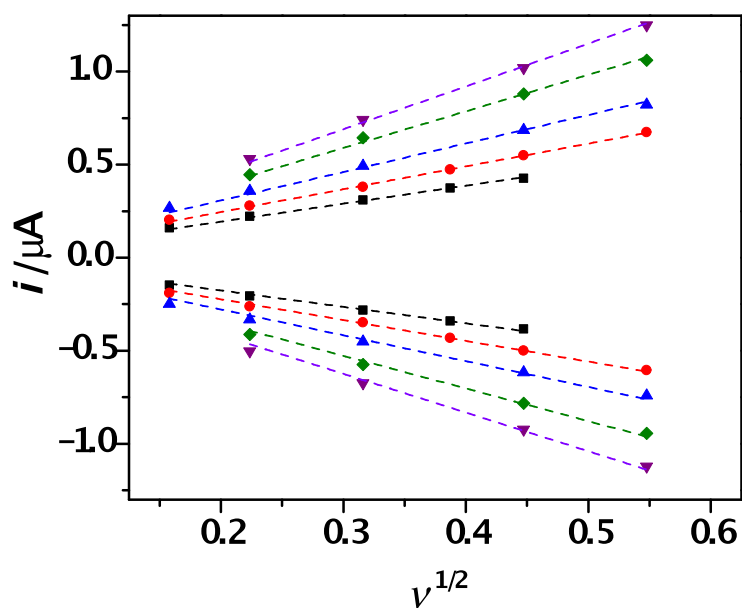

**Figure S2** Randles-Sevcik plots of  $i_{p,a}$  and  $i_{p,c}$  vs.  $v^{1/2}$  at  $T = 298 K$  (—),  $313 K$  (---),  $330 K$  (· · ·),  $348 K$  (- · -) and  $363 K$  (- - -).

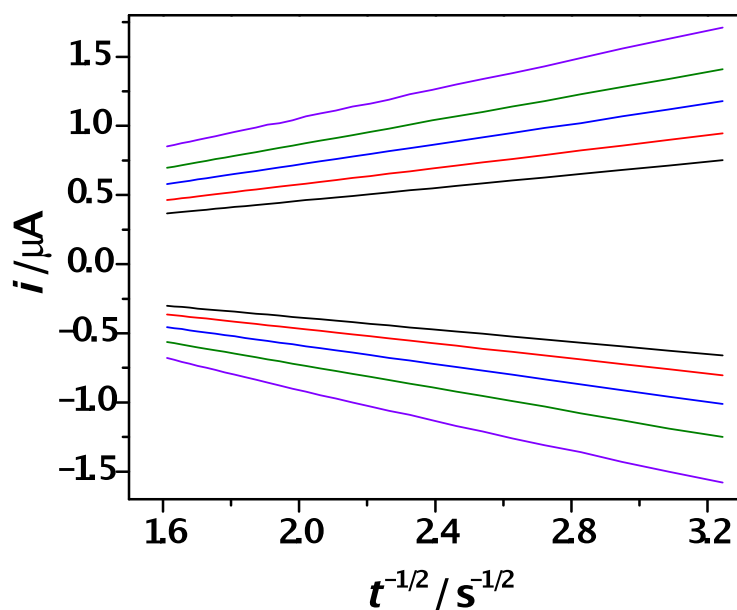

**Figure S3** Cottrell plots generated from the chronoamperometric curves obtained at WE2 in a 4.74 mM solution of  $[\text{FcC}_1\text{C}_1\text{Im}][\text{Tf}_2\text{N}]$  in  $[\text{C}_4\text{C}_1\text{Im}][\text{Tf}_2\text{N}]$ ,  $T = 298\text{ K}$  (—),  $313\text{ K}$  (—),  $330\text{ K}$  (—),  $348\text{ K}$  (—) and  $363\text{ K}$  (—),  $p = 5 \times 10^{-6}\text{ mbar}$ .

**Table S1** Diffusion coefficients obtained for the oxidised and reduced forms of  $[\text{FcC}_1\text{C}_1\text{Im}][\text{Tf}_2\text{N}]$  in  $[\text{C}_4\text{C}_1\text{Im}][\text{Tf}_2\text{N}]$  using CV and chronoamperometry recorded at different temperatures.

| $T / \text{K}$ | $D_{\text{RS}}$                                                                     | $D_{\text{RS}}$                                                                                 | $D_{\text{Cott}}$                                                                   | $D_{\text{Cott}}$                                                                               |
|----------------|-------------------------------------------------------------------------------------|-------------------------------------------------------------------------------------------------|-------------------------------------------------------------------------------------|-------------------------------------------------------------------------------------------------|
|                | $[\text{FcC}_1\text{C}_1\text{Im}]^+$<br>$\times 10^{-7}\text{ cm}^2\text{ s}^{-1}$ | $[\text{Fc}^+\text{C}_1\text{C}_1\text{Im}]^{2+}$<br>$\times 10^{-7}\text{ cm}^2\text{ s}^{-1}$ | $[\text{FcC}_1\text{C}_1\text{Im}]^+$<br>$\times 10^{-7}\text{ cm}^2\text{ s}^{-1}$ | $[\text{Fc}^+\text{C}_1\text{C}_1\text{Im}]^{2+}$<br>$\times 10^{-7}\text{ cm}^2\text{ s}^{-1}$ |
| 298            | $0.74 \pm 0.03$                                                                     | $0.62 \pm 0.02$                                                                                 | $1.09 \pm 0.06$                                                                     | $1.00 \pm 0.05$                                                                                 |
| 313            | $1.25 \pm 0.04$                                                                     | $1.12 \pm 0.04$                                                                                 | $1.73 \pm 0.08$                                                                     | $1.50 \pm 0.07$                                                                                 |
| 330            | $2.06 \pm 0.08$                                                                     | $1.69 \pm 0.07$                                                                                 | $2.68 \pm 0.12$                                                                     | $2.40 \pm 0.11$                                                                                 |
| 348            | $3.58 \pm 0.14$                                                                     | $2.85 \pm 0.11$                                                                                 | $3.87 \pm 0.18$                                                                     | $3.66 \pm 0.17$                                                                                 |
| 363            | $5.10 \pm 0.19$                                                                     | $4.19 \pm 0.17$                                                                                 | $5.73 \pm 0.26$                                                                     | $6.36 \pm 0.29$                                                                                 |

[FcC<sub>1</sub>C<sub>1</sub>Im][Tf<sub>2</sub>N] in [C<sub>8</sub>C<sub>1</sub>Im][Tf<sub>2</sub>N]

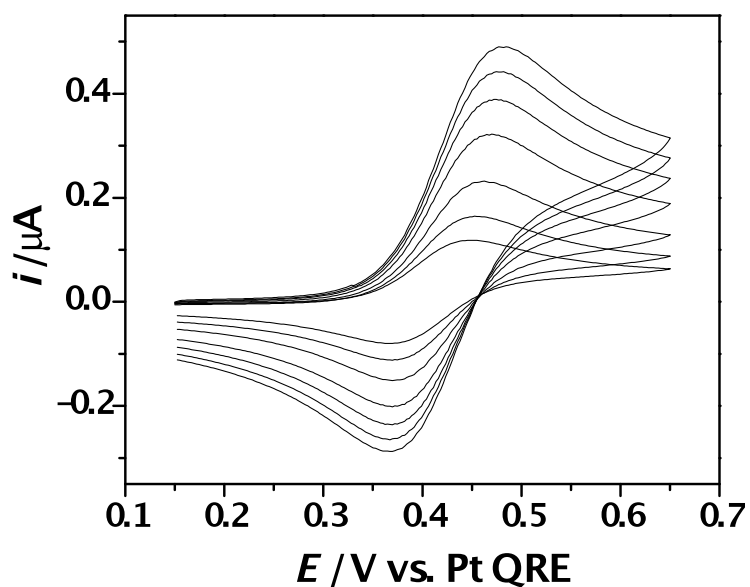

**Figure S4** CVs obtained at WE1 in a 4.88 mM solution of [FcC<sub>1</sub>C<sub>1</sub>Im][Tf<sub>2</sub>N] in [C<sub>8</sub>C<sub>1</sub>Im][Tf<sub>2</sub>N],  $\nu$  ranged from 25-500 mV s<sup>-1</sup>,  $T = 298$  K,  $p = 5 \times 10^{-6}$  mbar.

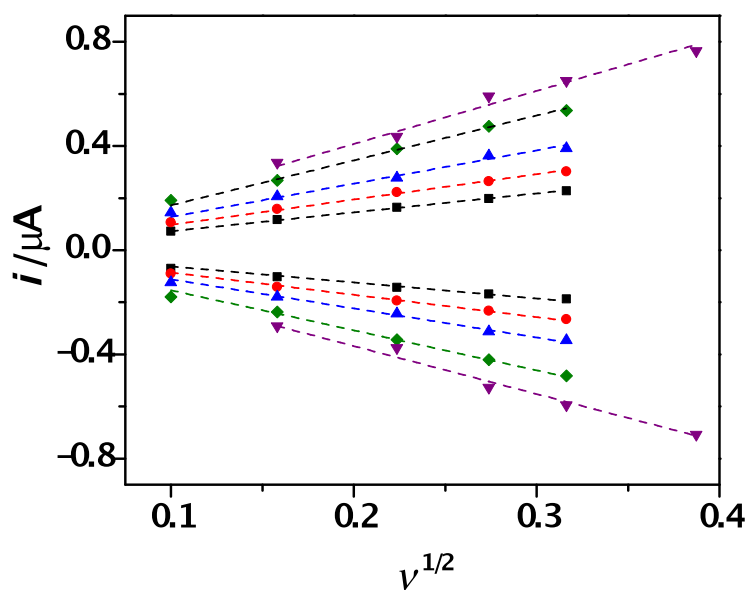

**Figure S5** Randles-Sevcik plots of  $i_{p,a}$  and  $i_{p,c}$  vs.  $\nu^{1/2}$  at  $T = 298$  K (—), 313 K (—), 330 K (—), 348 K (—) and 363 K (—).

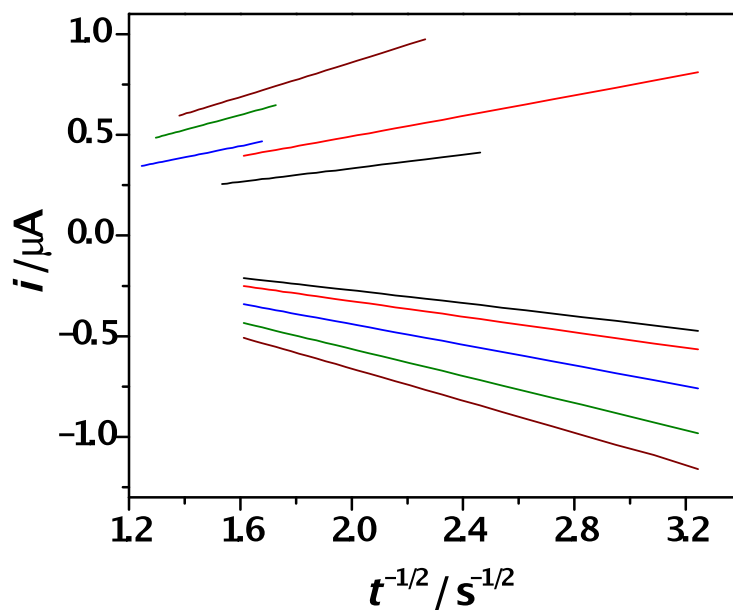

**Figure S6** Cottrell plots generated from the chronoamperometric curves obtained at WE2 in a 4.34 mM solution of  $[FcC_1C_1Im][Tf_2N]$  in  $[C_8C_1Im][Tf_2N]$ ,  $T = 298\text{ K}$  (—),  $313\text{ K}$  (—),  $330\text{ K}$  (—),  $348\text{ K}$  (—) and  $363\text{ K}$  (—),  $p = 5 \times 10^{-6}\text{ mbar}$ .

**Table S2** Diffusion coefficients obtained for the oxidised and reduced forms of  $[FcC_1C_1Im][Tf_2N]$  in  $[C_8C_1Im][Tf_2N]$  using CV and chronoamperometry recorded at different temperatures.

| $T / \text{K}$ | $D_{RS}$                                                       | $D_{RS}$                                                            | $D_{Cott}$                                                     | $D_{Cott}$                                                          |
|----------------|----------------------------------------------------------------|---------------------------------------------------------------------|----------------------------------------------------------------|---------------------------------------------------------------------|
|                | $[FcC_1C_1Im]^+$<br>$\times 10^{-7}\text{ cm}^2\text{ s}^{-1}$ | $[Fc^+C_1C_1Im]^{2+}$<br>$\times 10^{-7}\text{ cm}^2\text{ s}^{-1}$ | $[FcC_1C_1Im]^+$<br>$\times 10^{-7}\text{ cm}^2\text{ s}^{-1}$ | $[Fc^+C_1C_1Im]^{2+}$<br>$\times 10^{-7}\text{ cm}^2\text{ s}^{-1}$ |
| 298            | $0.37 \pm 0.01$                                                | $0.27 \pm 0.01$                                                     | $0.68 \pm 0.03$                                                | $0.63 \pm 0.03$                                                     |
| 313            | $0.70 \pm 0.03$                                                | $0.54 \pm 0.02$                                                     | $1.50 \pm 0.07$                                                | $0.92 \pm 0.05$                                                     |
| 330            | $1.27 \pm 0.05$                                                | $0.97 \pm 0.04$                                                     | $1.89 \pm 0.09$                                                | $1.61 \pm 0.08$                                                     |
| 348            | $2.43 \pm 0.09$                                                | $1.93 \pm 0.08$                                                     | $3.44 \pm 0.16$                                                | $2.76 \pm 0.13$                                                     |
| 363            | $3.55 \pm 0.15$                                                | $2.89 \pm 0.12$                                                     | $4.55 \pm 0.22$                                                | $3.89 \pm 0.18$                                                     |

A2.1  $[FcC_1C_1Im][Tf_2N]$  in  $[C_2C_1Im][BF_4]$

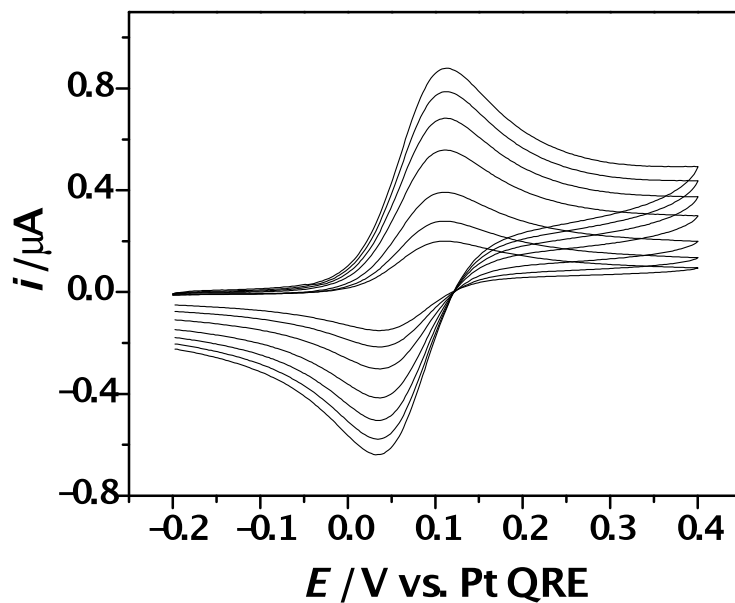

**Figure S7** CVs obtained at WE1 in a 4.56 mM solution of  $[FcC_1C_1Im][Tf_2N]$  in  $[C_2C_1Im][BF_4]$ ,  $v$  ranged from 25-500  $mV s^{-1}$ ,  $T = 298 K$ ,  $p = 5 \times 10^{-6}$  mbar.

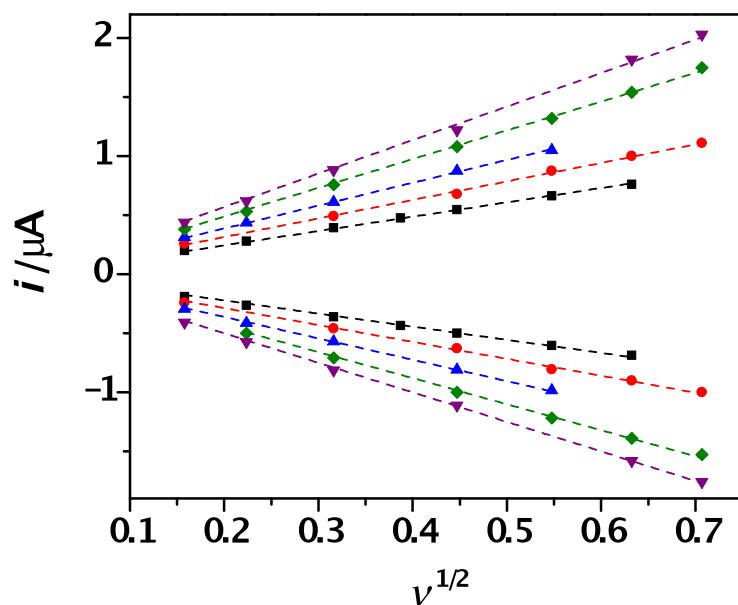

**Figure S8** Randles-Sevcik plots of  $i_{p,a}$  and  $i_{p,c}$  vs.  $v^{1/2}$  at  $T = 298 K$  (—),  $313 K$  (—),  $330 K$  (—),  $348 K$  (—) and  $363 K$  (—).

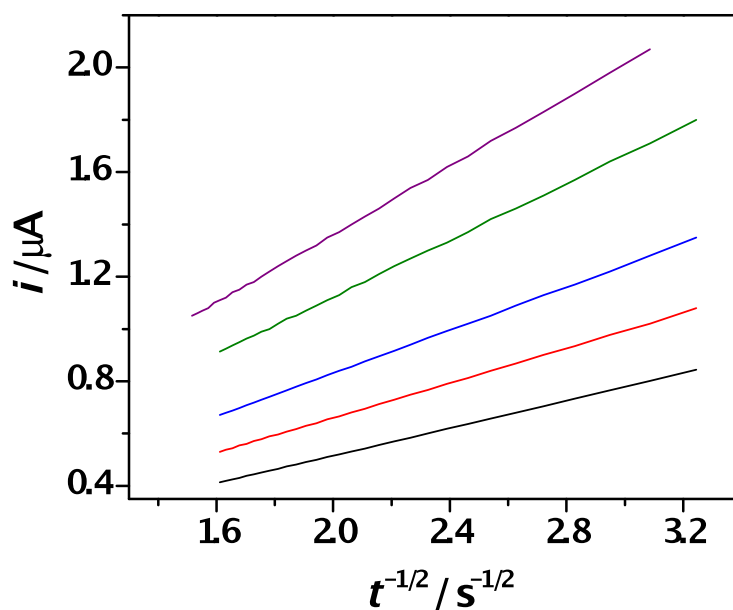

**Figure S9** Cottrell plots generated from the chronoamperometric curves obtained at WE2 in a 4.36 mM solution of  $[\text{FcC}_1\text{C}_1\text{Im}][\text{Tf}_2\text{N}]$  in  $[\text{C}_2\text{C}_1\text{Im}][\text{BF}_4]$ ,  $T = 298\text{ K}$  (—),  $313\text{ K}$  (—),  $330\text{ K}$  (—),  $348\text{ K}$  (—) and  $363\text{ K}$  (—),  $p = 5 \times 10^{-6}\text{ mbar}$ .

**Table S3** Diffusion coefficients obtained for the oxidised and reduced forms of  $[\text{FcC}_1\text{C}_1\text{Im}][\text{Tf}_2\text{N}]$  in  $[\text{C}_2\text{C}_1\text{Im}][\text{BF}_4]$  using CV and chronoamperometry recorded at different temperatures.

| $T / \text{K}$ | $D_{\text{RS}}$                                                                     | $D_{\text{RS}}$                                                                                 | $D_{\text{Cott}}$                                                                   |
|----------------|-------------------------------------------------------------------------------------|-------------------------------------------------------------------------------------------------|-------------------------------------------------------------------------------------|
|                | $[\text{FcC}_1\text{C}_1\text{Im}]^+$<br>$\times 10^{-7}\text{ cm}^2\text{ s}^{-1}$ | $[\text{Fc}^+\text{C}_1\text{C}_1\text{Im}]^{2+}$<br>$\times 10^{-7}\text{ cm}^2\text{ s}^{-1}$ | $[\text{FcC}_1\text{C}_1\text{Im}]^+$<br>$\times 10^{-7}\text{ cm}^2\text{ s}^{-1}$ |
| 298            | $1.19 \pm 0.04$                                                                     | $0.99 \pm 0.04$                                                                                 | $1.62 \pm 0.07$                                                                     |
| 313            | $2.08 \pm 0.07$                                                                     | $1.74 \pm 0.06$                                                                                 | $2.66 \pm 0.12$                                                                     |
| 330            | $3.26 \pm 0.12$                                                                     | $2.92 \pm 0.11$                                                                                 | $4.18 \pm 0.19$                                                                     |
| 348            | $5.55 \pm 0.20$                                                                     | $4.55 \pm 0.17$                                                                                 | $8.62 \pm 0.40$                                                                     |
| 363            | $7.87 \pm 0.30$                                                                     | $6.11 \pm 0.23$                                                                                 | $11.24 \pm 0.50$                                                                    |

[FcC<sub>1</sub>C<sub>1</sub>Im][Tf<sub>2</sub>N] in [C<sub>4</sub>C<sub>1</sub>Im][BF<sub>4</sub>]

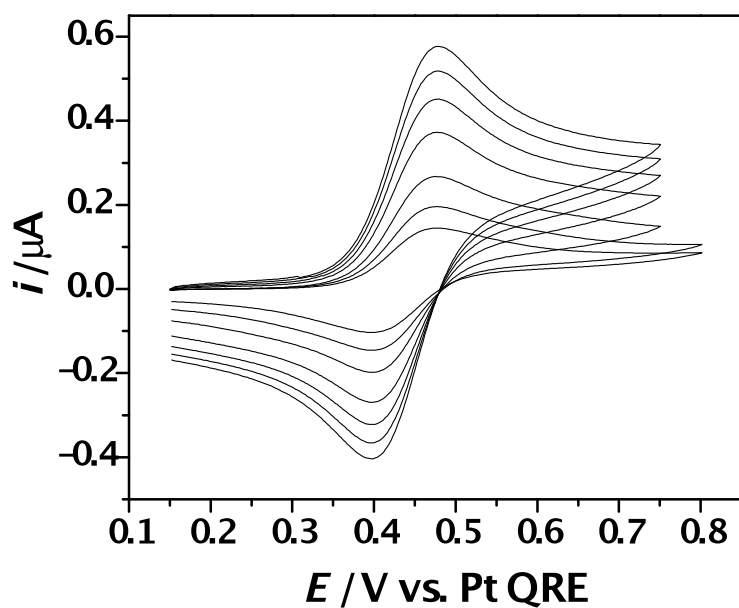

**Figure S10** CVs obtained at WE1 in a 4.66 mM solution of [FcC<sub>1</sub>C<sub>1</sub>Im][Tf<sub>2</sub>N] in [C<sub>4</sub>C<sub>1</sub>Im][BF<sub>4</sub>],  $v$  ranged from 25-500  $mV s^{-1}$ ,  $T = 298 K$ ,  $p = 5 \times 10^{-6}$  mbar.

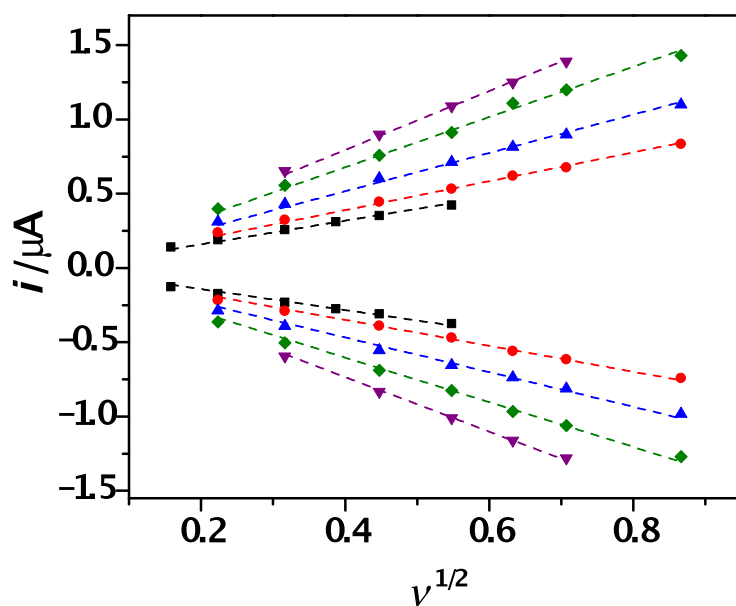

**Figure S11** Randles-Sevcik plots of  $i_{p,a}$  and  $i_{p,c}$  vs.  $v^{1/2}$  at  $T = 298 K$  (—),  $313 K$  (---),  $330 K$  (---),  $348 K$  (---) and  $363 K$  (---).



**Table S4** Diffusion coefficients obtained for the oxidised and reduced forms of  $[\text{FcC}_1\text{C}_1\text{Im}][\text{Tf}_2\text{N}]$  in  $[\text{C}_4\text{C}_1\text{Im}][\text{BF}_4]$  using CV recorded at different temperatures.

| $T / \text{K}$ | $D_{\text{RS}} [\text{FcC}_1\text{C}_1\text{Im}]^+$<br>$\times 10^{-7} \text{ cm}^2 \text{ s}^{-1}$ | $D_{\text{RS}}$<br>$[\text{Fc}^+\text{C}_1\text{C}_1\text{Im}]^{2+}$<br>$\times 10^{-7} \text{ cm}^2 \text{ s}^{-1}$ |
|----------------|-----------------------------------------------------------------------------------------------------|----------------------------------------------------------------------------------------------------------------------|
| 298            | $0.49 \pm 0.02$                                                                                     | $0.38 \pm 0.01$                                                                                                      |
| 313            | $0.76 \pm 0.03$                                                                                     | $0.62 \pm 0.02$                                                                                                      |
| 330            | $1.42 \pm 0.05$                                                                                     | $1.16 \pm 0.04$                                                                                                      |
| 348            | $2.63 \pm 0.10$                                                                                     | $2.08 \pm 0.08$                                                                                                      |
| 363            | $3.7 \pm 0.14$                                                                                      | $3.15 \pm 0.12$                                                                                                      |

[FcC<sub>1</sub>C<sub>1</sub>Im][Tf<sub>2</sub>N] in [C<sub>8</sub>C<sub>1</sub>Im][BF<sub>4</sub>]

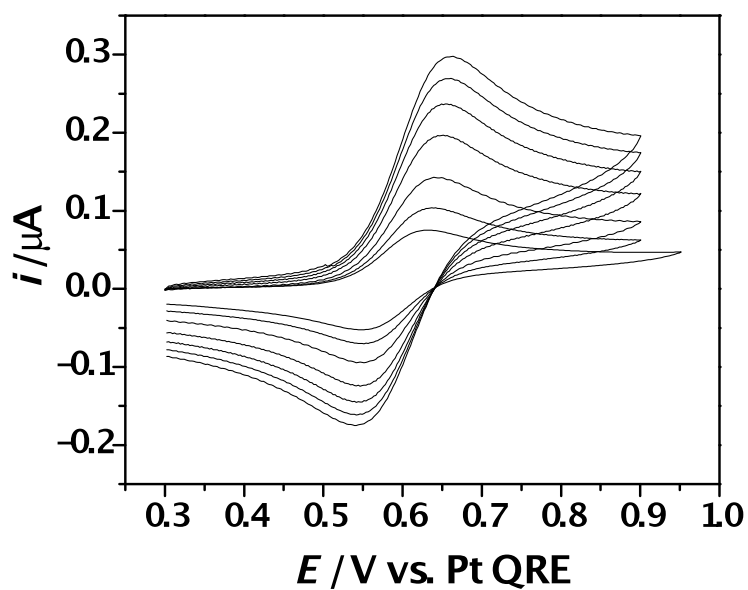

**Figure S12** CVs obtained at WE1 in a 4.66 mM solution of [FcC<sub>1</sub>C<sub>1</sub>Im][Tf<sub>2</sub>N] in [C<sub>8</sub>C<sub>1</sub>Im][BF<sub>4</sub>],  $v$  ranged from 25-500 mV s<sup>-1</sup>,  $T = 298$  K,  $p = 5 \times 10^{-6}$  mbar.

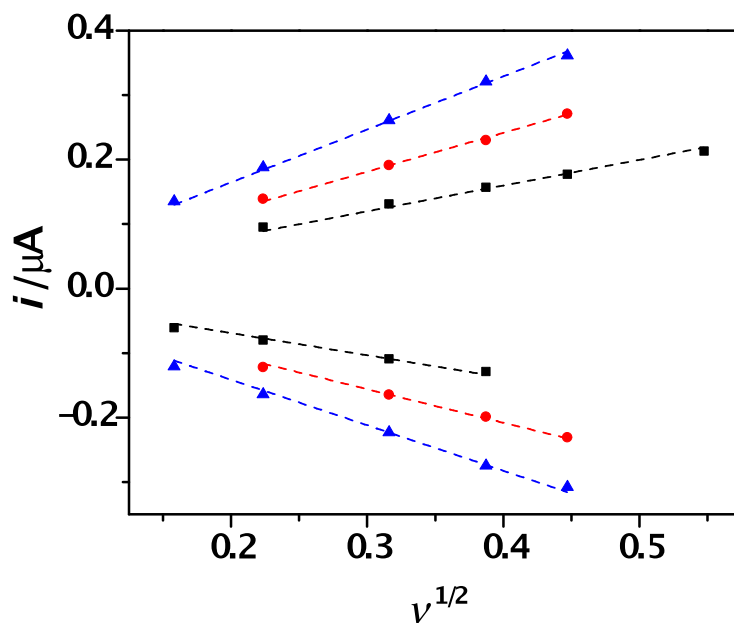

**Figure S13** Randles-Sevcik plots of  $i_{p,a}$  and  $i_{p,c}$  vs.  $v^{1/2}$  at  $T = 298$  K (—), 313 K (—), and 330 K (—).

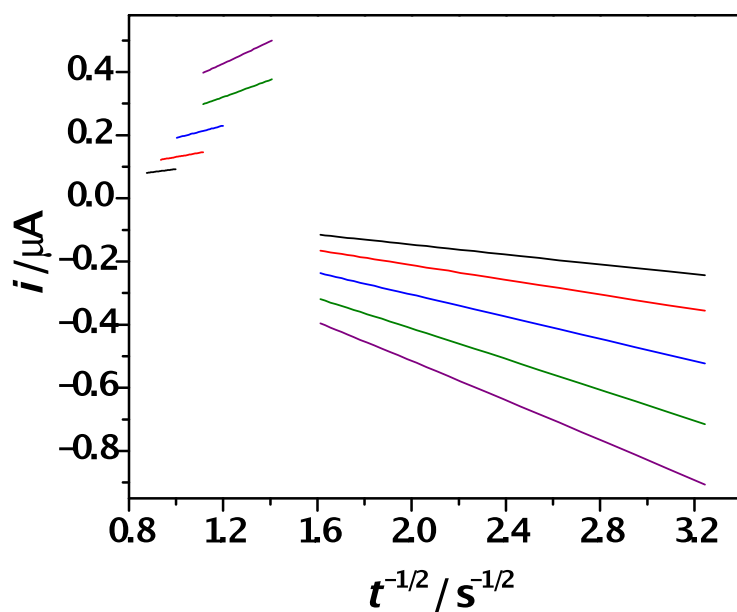

**Figure S14** Cottrell plots generated from the chronoamperometric curves obtained at WE2 in a 4.36 mM solution of  $[\text{FcC}_1\text{C}_1\text{Im}][\text{Tf}_2\text{N}]$  in  $[\text{C}_8\text{C}_1\text{Im}][\text{BF}_4]$ ,  $T = 298\text{ K}$  (—),  $313\text{ K}$  (—),  $328\text{ K}$  (—),  $348\text{ K}$  (—) and  $363\text{ K}$  (—),  $p = 5 \times 10^{-6}\text{ mbar}$ .

**Table S5** Diffusion coefficients obtained for the oxidised and reduced forms of  $[\text{FcC}_1\text{C}_1\text{Im}][\text{Tf}_2\text{N}]$  in  $[\text{C}_8\text{C}_1\text{Im}][\text{BF}_4]$  using CV and chronoamperometry recorded at different temperatures.

| $T / \text{K}$ | $D_{\text{RS}}$                                                                     | $D_{\text{RS}}$                                                                                 | $D_{\text{Cott}}$                                                                   | $D_{\text{Cott}}$                                                                               |
|----------------|-------------------------------------------------------------------------------------|-------------------------------------------------------------------------------------------------|-------------------------------------------------------------------------------------|-------------------------------------------------------------------------------------------------|
|                | $[\text{FcC}_1\text{C}_1\text{Im}]^+$<br>$\times 10^{-8}\text{ cm}^2\text{ s}^{-1}$ | $[\text{Fc}^+\text{C}_1\text{C}_1\text{Im}]^{2+}$<br>$\times 10^{-8}\text{ cm}^2\text{ s}^{-1}$ | $[\text{FcC}_1\text{C}_1\text{Im}]^+$<br>$\times 10^{-8}\text{ cm}^2\text{ s}^{-1}$ | $[\text{Fc}^+\text{C}_1\text{C}_1\text{Im}]^{2+}$<br>$\times 10^{-8}\text{ cm}^2\text{ s}^{-1}$ |
| 298            | $1.2 \pm 0.1$                                                                       | $0.9 \pm 0.1$                                                                                   | $1.9 \pm 0.1$                                                                       | $1.4 \pm 0.1$                                                                                   |
| 313            | $2.8 \pm 0.1$                                                                       | $2.1 \pm 0.1$                                                                                   | $3.8 \pm 0.2$                                                                       | $3.0 \pm 0.1$                                                                                   |
| 330            | $5.4 \pm 0.2$                                                                       | $4.0 \pm 0.2$                                                                                   | $8.1 \pm 0.4$                                                                       | $6.7 \pm 0.3$                                                                                   |
| 348            | -                                                                                   | -                                                                                               | $15.7 \pm 0.7$                                                                      | $12.9 \pm 0.6$                                                                                  |
| 363            | -                                                                                   | -                                                                                               | $27.8 \pm 1.3$                                                                      | $21.4 \pm 1.0$                                                                                  |

[FcC<sub>1</sub>C<sub>1</sub>Im][Tf<sub>2</sub>N] in [C<sub>4</sub>C<sub>1</sub>Im][PF<sub>6</sub>]

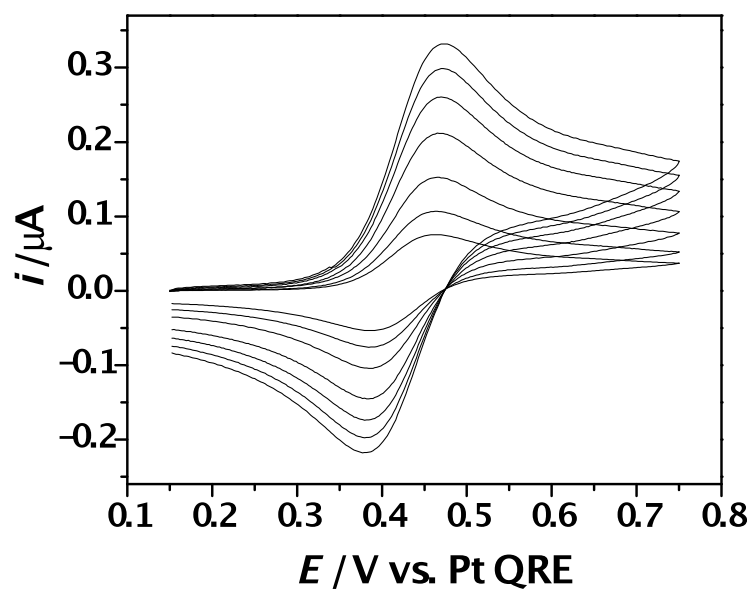

**Figure S15** CVs obtained at WE1 in a 4.20 mM solution of [FcC<sub>1</sub>C<sub>1</sub>Im][Tf<sub>2</sub>N] in [C<sub>4</sub>C<sub>1</sub>Im][PF<sub>6</sub>],  $\nu$  ranged from 25-500 mV s<sup>-1</sup>,  $T = 298$  K,  $p = 5 \times 10^{-6}$  mbar.

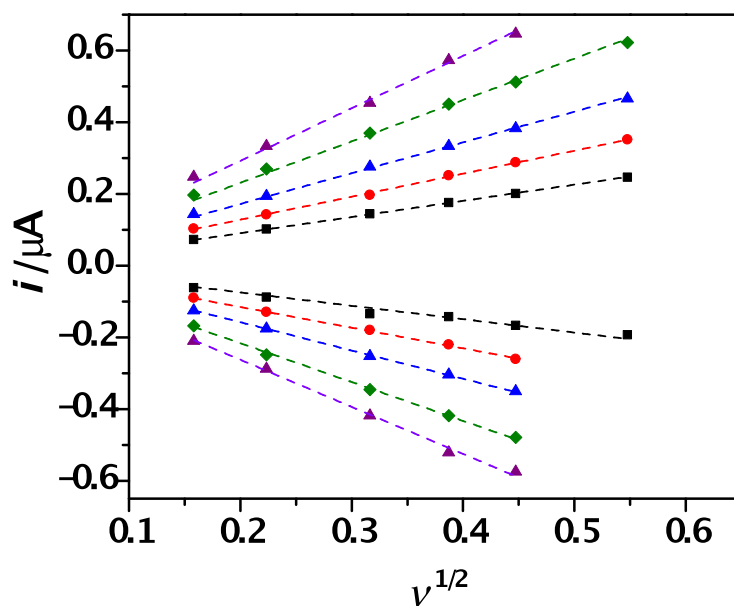

**Figure S16** Randles-Sevcik plots of  $i_{p,a}$  and  $i_{p,c}$  vs.  $\nu^{1/2}$  at  $T = 298$  K (—), 313 K (—), 330 K (—), 348 K (—) and 363 K (—).

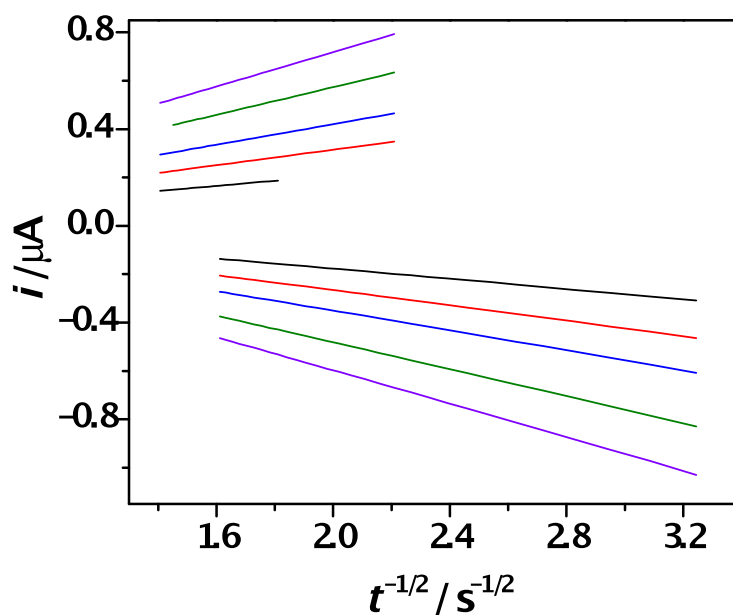

**Figure S17** Cottrell plots generated from the chronoamperometric curves obtained at WE2 in a 4.38 mM solution of  $[\text{FcC}_1\text{C}_1\text{Im}][\text{Tf}_2\text{N}]$  in  $[\text{C}_4\text{C}_1\text{Im}][\text{PF}_6]$ ,  $T = 298 \text{ K}$  (—),  $318 \text{ K}$  (—),  $330 \text{ K}$  (—),  $348 \text{ K}$  (—) and  $363 \text{ K}$  (—),  $p = 5 \times 10^{-6} \text{ mbar}$ .

**Table S6** Diffusion coefficients obtained for the oxidised and reduced forms of  $[\text{FcC}_1\text{C}_1\text{Im}][\text{Tf}_2\text{N}]$  in  $[\text{C}_4\text{C}_1\text{Im}][\text{PF}_6]$  using CV and chronoamperometry recorded at different temperatures.

| $T / \text{K}$ | $D_{\text{RS}}$                                                                       | $D_{\text{RS}}$                                                                                   | $D_{\text{Cott}}$                                                                     | $D_{\text{Cott}}$                                                                                 |
|----------------|---------------------------------------------------------------------------------------|---------------------------------------------------------------------------------------------------|---------------------------------------------------------------------------------------|---------------------------------------------------------------------------------------------------|
|                | $[\text{FcC}_1\text{C}_1\text{Im}]^+$<br>$\times 10^{-8} \text{ cm}^2 \text{ s}^{-1}$ | $[\text{Fc}^+\text{C}_1\text{C}_1\text{Im}]^{2+}$<br>$\times 10^{-8} \text{ cm}^2 \text{ s}^{-1}$ | $[\text{FcC}_1\text{C}_1\text{Im}]^+$<br>$\times 10^{-8} \text{ cm}^2 \text{ s}^{-1}$ | $[\text{Fc}^+\text{C}_1\text{C}_1\text{Im}]^{2+}$<br>$\times 10^{-8} \text{ cm}^2 \text{ s}^{-1}$ |
| 298            | $1.9 \pm 0.1$                                                                         | $1.3 \pm 0.1$                                                                                     | $2.6 \pm 0.1$                                                                         | $2.7 \pm 0.2$                                                                                     |
| 313            | $4.1 \pm 0.1$                                                                         | $3.3 \pm 0.1$                                                                                     | -                                                                                     | -                                                                                                 |
| 318            | -                                                                                     | -                                                                                                 | $6.0 \pm 0.3$                                                                         | $6.0 \pm 0.3$                                                                                     |
| 330            | $7.7 \pm 0.3$                                                                         | $6.5 \pm 0.2$                                                                                     | $10.6 \pm 0.5$                                                                        | $10.1 \pm 0.5$                                                                                    |
| 348            | $14.5 \pm 0.5$                                                                        | $13.0 \pm 0.5$                                                                                    | $19.9 \pm 1.0$                                                                        | $18.7 \pm 0.8$                                                                                    |
| 363            | $24.6 \pm 0.9$                                                                        | $19.9 \pm 0.8$                                                                                    | $31.2 \pm 1.4$                                                                        | $28.6 \pm 1.3$                                                                                    |

[FcC<sub>1</sub>C<sub>1</sub>Im][Tf<sub>2</sub>N] in [C<sub>8</sub>C<sub>1</sub>Im][PF<sub>6</sub>]

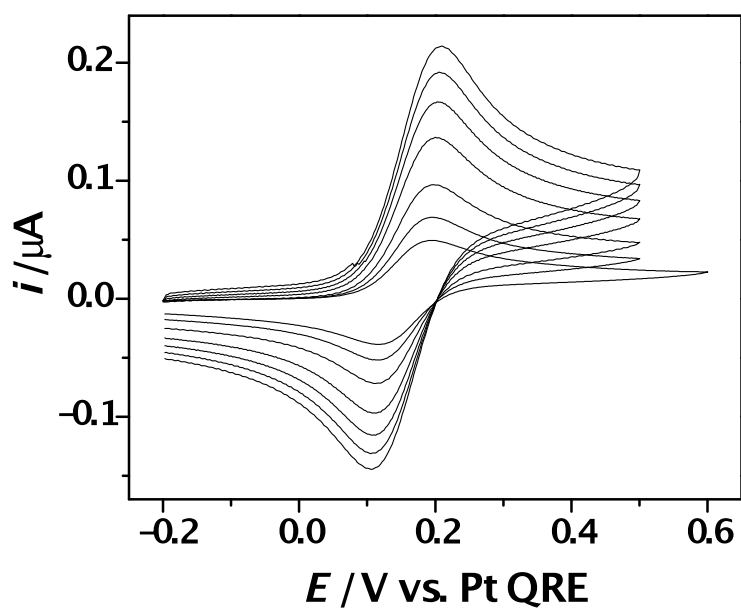

**Figure S18** CVs obtained at WE1 in a 4.74 mM solution of [FcC<sub>1</sub>C<sub>1</sub>Im][Tf<sub>2</sub>N] in [C<sub>8</sub>C<sub>1</sub>Im][PF<sub>6</sub>],  $v$  ranged from 25-500  $\text{mV s}^{-1}$ ,  $T = 298 \text{ K}$ ,  $p = 5 \times 10^{-6} \text{ mbar}$ .

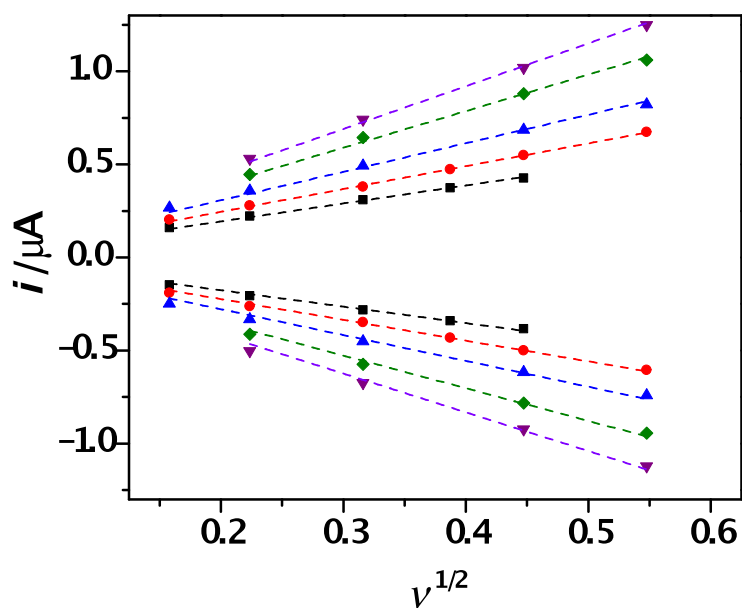

**Figure S19** Randles-Sevcik plots of  $i_{p,a}$  and  $i_{p,c}$  vs.  $v^{1/2}$  at  $T = 298 \text{ K}$  (—),  $313 \text{ K}$  (—),  $330 \text{ K}$  (—) and  $348 \text{ K}$  (—).

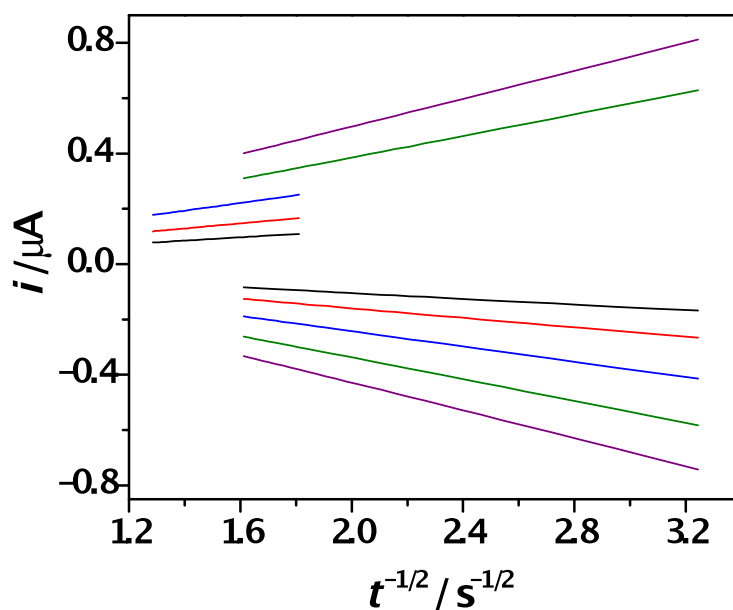

**Figure S20** Cottrell plots generated from the chronoamperometric curves obtained at WE2 in a 4.42 mM solution of  $[\text{FcC}_1\text{C}_1\text{Im}][\text{Tf}_2\text{N}]$  in  $[\text{C}_8\text{C}_1\text{Im}][\text{PF}_6]$ ,  $T = 298 \text{ K}$  (—),  $313 \text{ K}$  (—),  $330 \text{ K}$  (—),  $348 \text{ K}$  (—) and  $363 \text{ K}$  (—),  $p = 5 \times 10^{-6} \text{ mbar}$ .

**Table S7** Diffusion coefficients obtained for the oxidised and reduced forms of  $[\text{FcC}_1\text{C}_1\text{Im}][\text{Tf}_2\text{N}]$  in  $[\text{C}_8\text{C}_1\text{Im}][\text{PF}_6]$  using CV and chronoamperometry recorded at different temperatures.

| $T / \text{K}$ | $D_{\text{RS}}$                                                                       | $D_{\text{RS}}$                                                                                   | $D_{\text{Cott}}$                                                                     | $D_{\text{Cott}}$                                                                                 |
|----------------|---------------------------------------------------------------------------------------|---------------------------------------------------------------------------------------------------|---------------------------------------------------------------------------------------|---------------------------------------------------------------------------------------------------|
|                | $[\text{FcC}_1\text{C}_1\text{Im}]^+$<br>$\times 10^{-8} \text{ cm}^2 \text{ s}^{-1}$ | $[\text{Fc}^+\text{C}_1\text{C}_1\text{Im}]^{2+}$<br>$\times 10^{-8} \text{ cm}^2 \text{ s}^{-1}$ | $[\text{FcC}_1\text{C}_1\text{Im}]^+$<br>$\times 10^{-8} \text{ cm}^2 \text{ s}^{-1}$ | $[\text{Fc}^+\text{C}_1\text{C}_1\text{Im}]^{2+}$<br>$\times 10^{-8} \text{ cm}^2 \text{ s}^{-1}$ |
| 298            | $0.6 \pm 0.1$                                                                         | $0.5 \pm 0.1$                                                                                     | $0.9 \pm 0.1$                                                                         | $0.7 \pm 0.1$                                                                                     |
| 313            | $1.4 \pm 0.1$                                                                         | $1.2 \pm 0.1$                                                                                     | $2.0 \pm 0.1$                                                                         | $1.8 \pm 0.1$                                                                                     |
| 330            | $3.3 \pm 0.1$                                                                         | $2.8 \pm 0.1$                                                                                     | $4.5 \pm 0.2$                                                                         | $4.5 \pm 0.2$                                                                                     |
| 348            | $7.6 \pm 0.3$                                                                         | $6.6 \pm 0.3$                                                                                     | $8.8 \pm 0.4$                                                                         | $9.1 \pm 0.4$                                                                                     |
| 363            | -                                                                                     | -                                                                                                 | $14.7 \pm 0.7$                                                                        | $14.9 \pm 0.7$                                                                                    |

[FcC<sub>1</sub>C<sub>1</sub>Im][Tf<sub>2</sub>N] in [C<sub>2</sub>C<sub>1</sub>Im][EtOSO<sub>3</sub>]

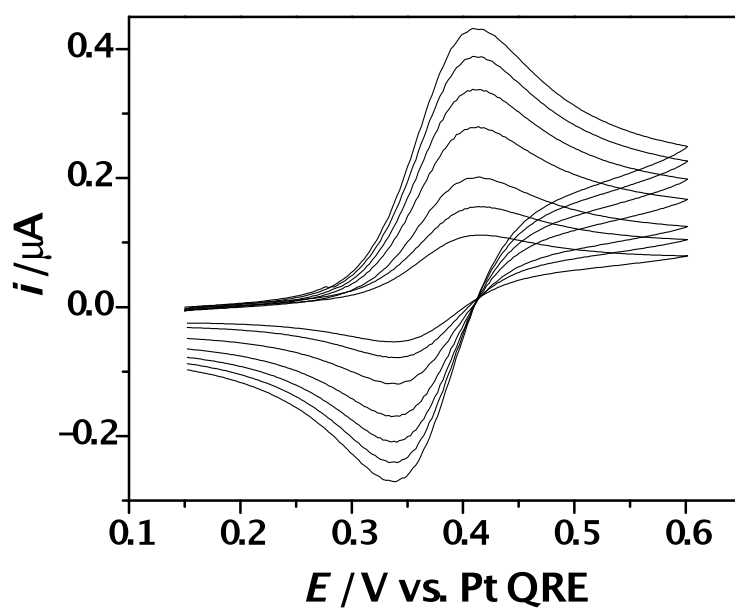

**Figure S21** CVs obtained at WE1 in a 4.44 mM solution of [FcC<sub>1</sub>C<sub>1</sub>Im][Tf<sub>2</sub>N] in [C<sub>2</sub>C<sub>1</sub>Im][EtOSO<sub>3</sub>],  $\nu$  ranged from 25-500 mV s<sup>-1</sup>,  $T = 298$  K,  $p = 5 \times 10^{-6}$  mbar.

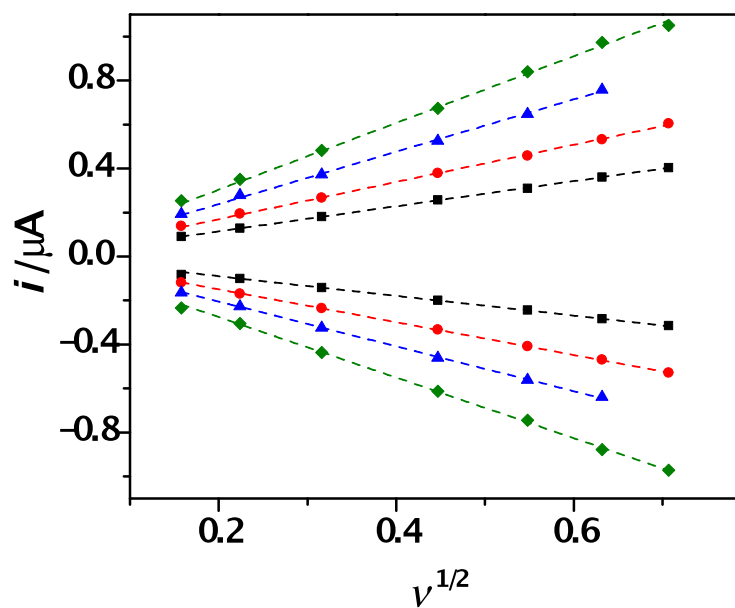

**Figure S22** Randles-Sevcik plots of  $i_{p,a}$  and  $i_{p,c}$  vs.  $\nu^{1/2}$  at  $T = 298$  K (—), 323 K (—), 348 K (—) and 373 K (—).



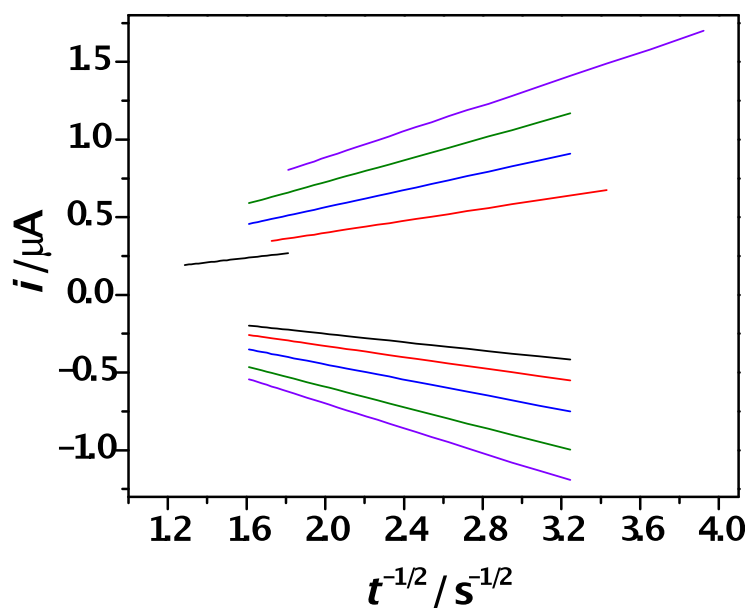

**Figure S23** Cottrell plots generated from the chronoamperometric curves obtained at WE2 in a 4.67 mM solution of  $[FcC_1C_1Im][Tf_2N]$  in  $[C_2C_1Im][EtOSO_3]$ ,  $T = 298\text{ K}$  (—),  $313\text{ K}$  (—),  $330\text{ K}$  (—),  $348\text{ K}$  (—) and  $363\text{ K}$  (—),  $p = 5 \times 10^{-6}\text{ mbar}$ .

**Table S8** Diffusion coefficients obtained for the oxidised and reduced forms of  $[FcC_1C_1Im][Tf_2N]$  in  $[C_2C_1Im][EtOSO_3]$  using CV and chronoamperometry recorded at different temperatures.

| $T / \text{K}$ | $D_{RS}$                                                       | $D_{RS}$                                                            | $D_{Cott}$                                                     | $D_{Cott}$                                                          |
|----------------|----------------------------------------------------------------|---------------------------------------------------------------------|----------------------------------------------------------------|---------------------------------------------------------------------|
|                | $[FcC_1C_1Im]^+$<br>$\times 10^{-7}\text{ cm}^2\text{ s}^{-1}$ | $[Fc^+C_1C_1Im]^{2+}$<br>$\times 10^{-7}\text{ cm}^2\text{ s}^{-1}$ | $[FcC_1C_1Im]^+$<br>$\times 10^{-7}\text{ cm}^2\text{ s}^{-1}$ | $[Fc^+C_1C_1Im]^{2+}$<br>$\times 10^{-7}\text{ cm}^2\text{ s}^{-1}$ |
| 298            | $0.34 \pm 0.01$                                                | $0.24 \pm 0.01$                                                     | $0.47 \pm 0.02$                                                | $0.39 \pm 0.02$                                                     |
| 313            | -                                                              | -                                                                   | $0.84 \pm 0.04$                                                | $0.68 \pm 0.03$                                                     |
| 323            | $0.81 \pm 0.03$                                                | $0.63 \pm 0.02$                                                     | -                                                              | -                                                                   |
| 330            | -                                                              | -                                                                   | $1.68 \pm 0.07$                                                | $1.27 \pm 0.06$                                                     |
| 348            | $1.72 \pm 0.06$                                                | $1.26 \pm 0.05$                                                     | $2.78 \pm 0.13$                                                | $2.27 \pm 0.10$                                                     |
| 363            | -                                                              | -                                                                   | $4.01 \pm 0.19$                                                | $3.37 \pm 0.15$                                                     |
| 373            | $3.00 \pm 0.12$                                                | $2.46 \pm 0.09$                                                     | -                                                              | -                                                                   |

**[FcC<sub>1</sub>C<sub>1</sub>Im][Tf<sub>2</sub>N] in [C<sub>2</sub>C<sub>1</sub>Im][Tf<sub>2</sub>N] with Ferrocene**

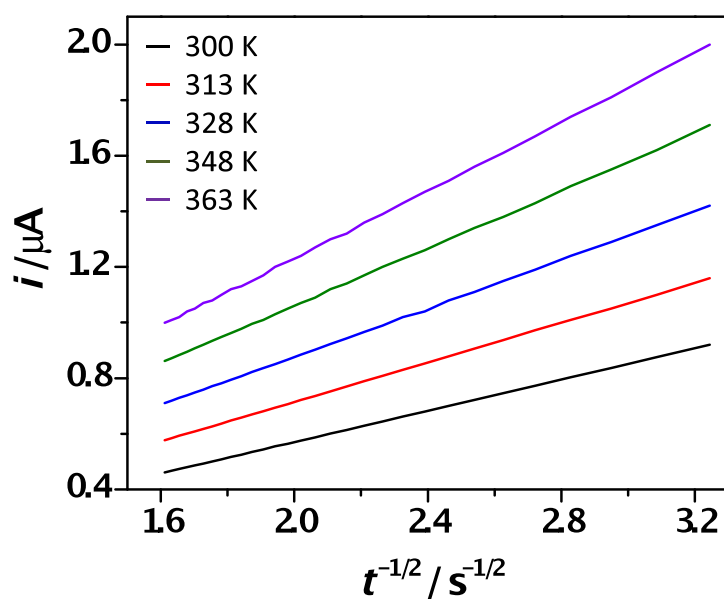

**Figure S24** Cottrell plots for the oxidation of  $[\text{FcC}_1\text{C}_1\text{Im}][\text{Tf}_2\text{N}]$  generated from the chronoamperometric curves obtained at WE2 in a 4.68 mM solution of  $[\text{FcC}_1\text{C}_1\text{Im}][\text{Tf}_2\text{N}]$  in  $[\text{C}_2\text{C}_1\text{Im}][\text{Tf}_2\text{N}]$ ,  $T = 300\text{ K}$  (—),  $313\text{ K}$  (—),  $328\text{ K}$  (—),  $348\text{ K}$  (—) and  $363\text{ K}$  (—),  $p = 5 \times 10^{-6}$  mbar.

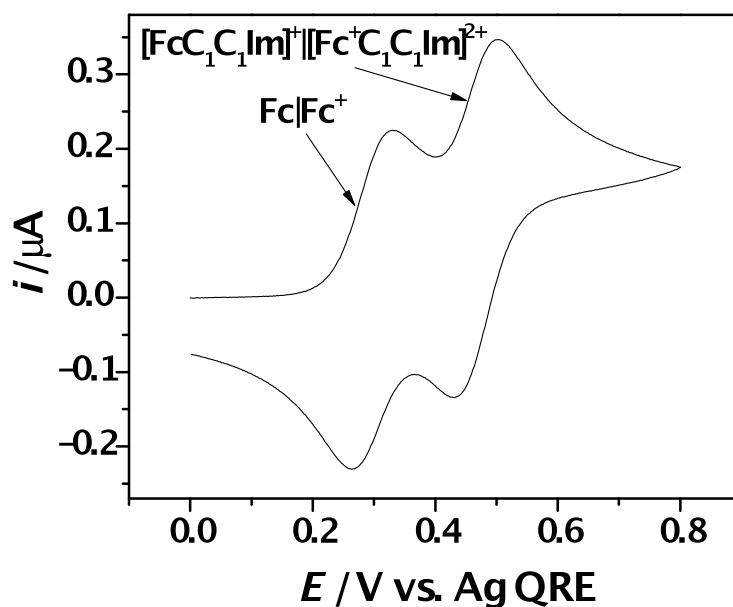

**Figure S25** CV recorded obtained at WE2 in a 4.48 mM solution of  $\text{FcC}_1\text{Im}$  in  $[\text{C}_2\text{C}_1\text{Im}][\text{Tf}_2\text{N}]$  doped with 2.54 mM ferrocene,  $v = 50\text{ mV s}^{-1}$ ,  $T = 298\text{ K}$ ,  $p = 1\text{ atm}$ .

**FcC<sub>1</sub>Im in [C<sub>2</sub>C<sub>1</sub>Im][Tf<sub>2</sub>N]**

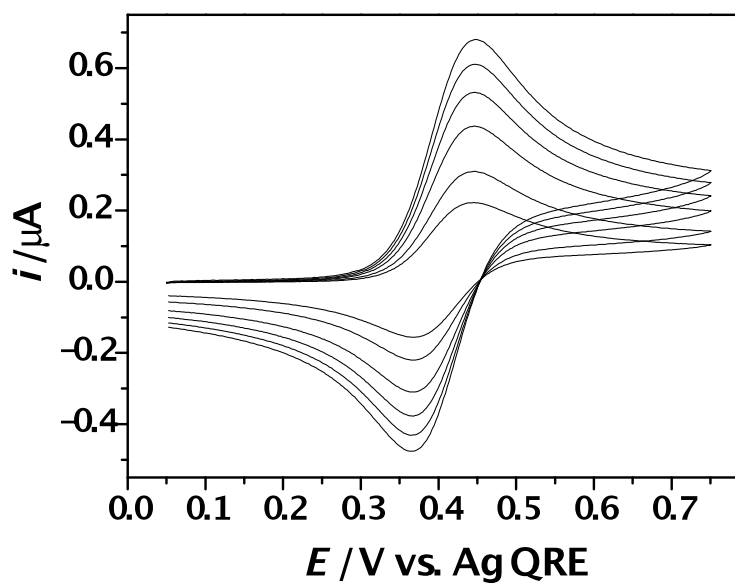

**Figure S26** CVs obtained at WE2 in a 4.56 mM solution of FcC<sub>1</sub>Im in [C<sub>2</sub>C<sub>1</sub>Im][Tf<sub>2</sub>N],  $v$  ranged from 25-500  $\text{mV s}^{-1}$ ,  $T = 298 \text{ K}$ ,  $p = 1 \text{ atm}$ .

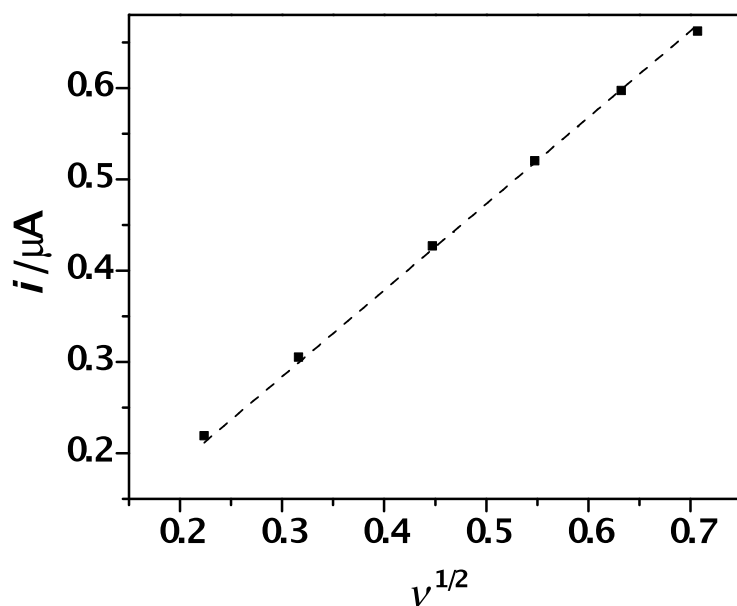

**Figure S27** Randles-Sevcik plots of  $i_{p,a}$  vs.  $v^{1/2}$  at  $T = 298 \text{ K}$ .

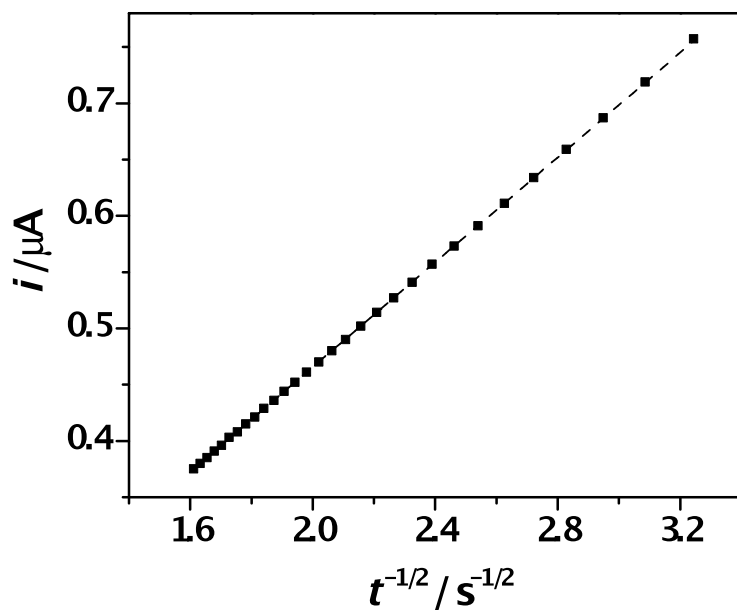

**Figure S28** Cottrell plot generated from the chronoamperometric curve recorded at WE2 in a 4.56 mM solution of  $FcC_1Im$  in  $[C_2C_1Im][Tf_2N]$ ,  $T = 298 K$ ,  $p = 1 atm$ .

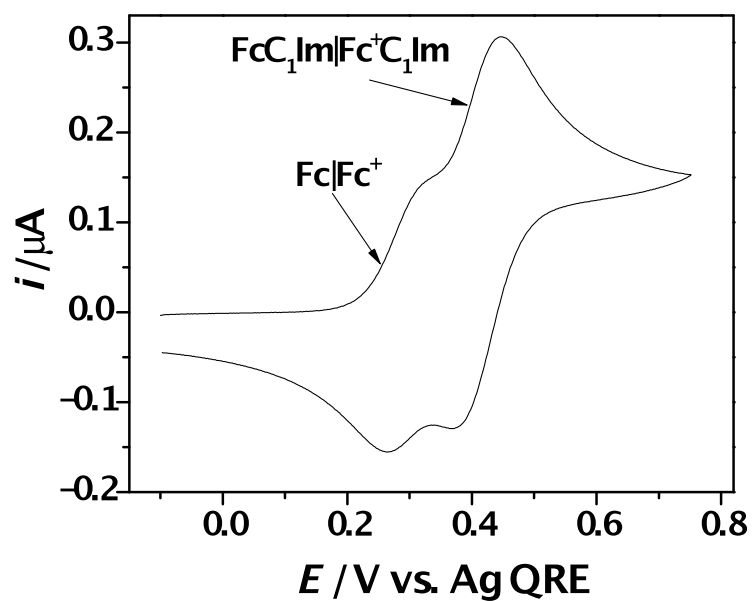

**Figure S29** CV recorded obtained at WE2 in a 4.56 mM solution of  $FcC_1Im$  in  $[C_2C_1Im][Tf_2N]$  doped with 1.55 mM ferrocene,  $v = 50 mV s^{-1}$ ,  $T = 298 K$ ,  $p = 1 atm$ .

[FcC<sub>1</sub>NMe<sub>3</sub>][Tf<sub>2</sub>N] in [C<sub>2</sub>C<sub>1</sub>Im][Tf<sub>2</sub>N]

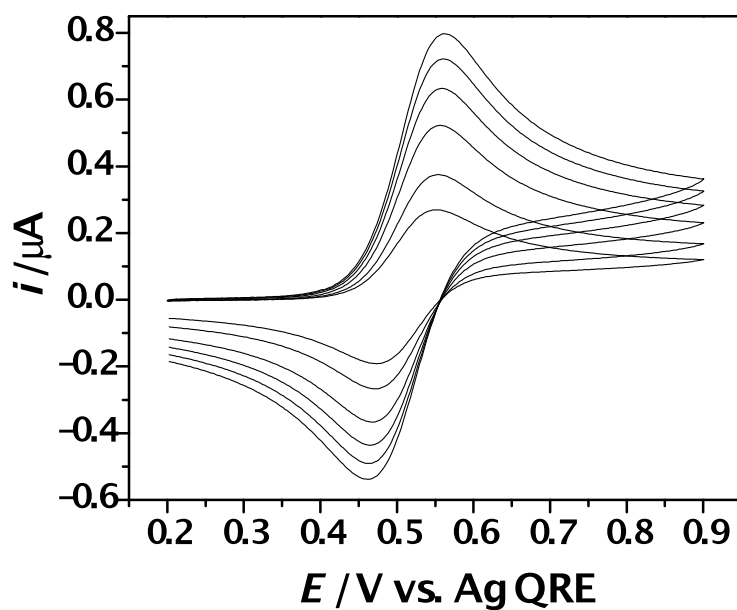

**Figure S30** CVs obtained at WE2 in a 4.79 mM solution of [FcC<sub>1</sub>NMe<sub>3</sub>][Tf<sub>2</sub>N] in [C<sub>2</sub>C<sub>1</sub>Im][Tf<sub>2</sub>N],  $\nu$  ranged from 25-500  $\text{mV s}^{-1}$ ,  $T = 298 \text{ K}$ ,  $p = 1 \text{ atm}$ .

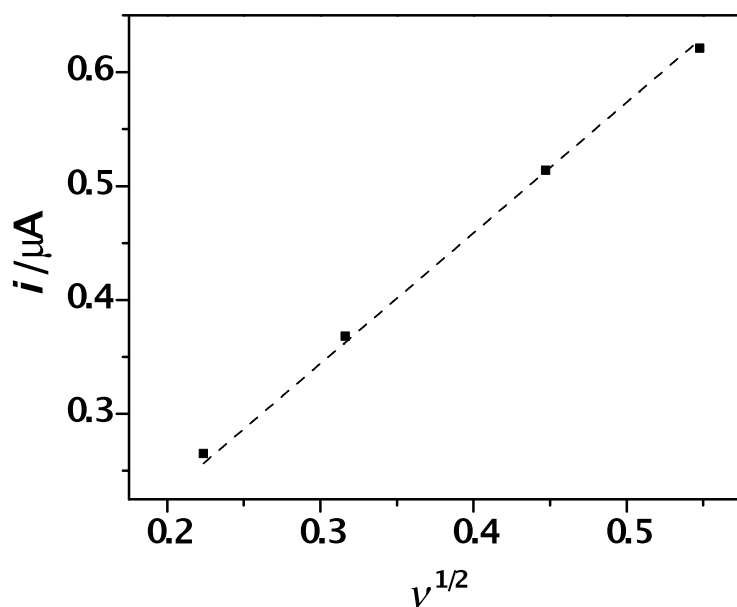

**Figure S31** Randles-Sevcik plots of  $i_{p,a}$  vs.  $\nu^{1/2}$  at  $T = 298 \text{ K}$ .

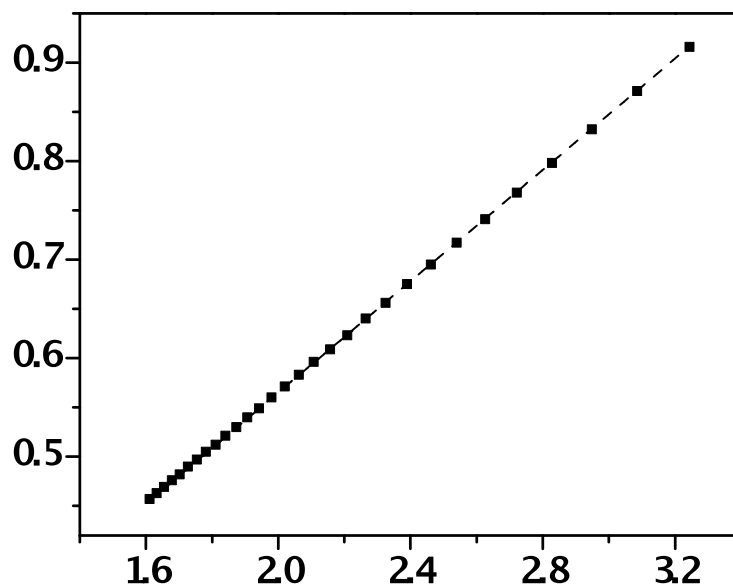

**Figure S32** Cottrell plot generated from the chronoamperometric curve recorded at WE2 in a 4.79 mM solution of  $[\text{FcC}_1\text{NMe}_3][\text{Tf}_2\text{N}]$  in  $[\text{C}_2\text{C}_1\text{Im}][\text{Tf}_2\text{N}]$ ,  $T = 298 \text{ K}$ ,  $p = 1 \text{ atm}$ .

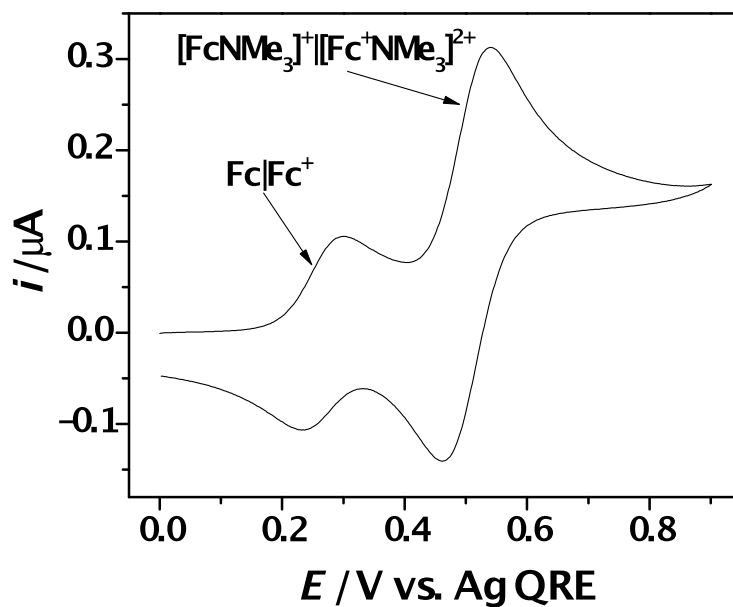

**Figure S33** CV recorded obtained at WE2 in a 4.79 mM solution of  $[\text{FcC}_1\text{NMe}_3][\text{Tf}_2\text{N}]$  in  $[\text{C}_2\text{C}_1\text{Im}][\text{Tf}_2\text{N}]$  doped with 1.25 mM ferrocene,  $v = 50 \text{ mV s}^{-1}$ ,  $T = 298 \text{ K}$ ,  $p = 1 \text{ atm}$ .

**Table S9** Data used to calculate the hole radius,  $r_H$ , and correlation length,  $\zeta$ , values presented in Figure 5.

| Ionic Liquid                                          | T /<br>K | $\gamma$ /<br>mN m <sup>-1</sup> | $r_H$ /<br>Å | $\eta$ /<br>Pa s | $D_{\text{Cott}}$<br>$\times 10^{-7}$ cm <sup>2</sup> s <sup>-1</sup> | $\zeta$ /<br>Å |
|-------------------------------------------------------|----------|----------------------------------|--------------|------------------|-----------------------------------------------------------------------|----------------|
| [C <sub>2</sub> C <sub>1</sub> Im][Tf <sub>2</sub> N] | 298      | 36.0                             | 1.78         | 0.0342           | 1.71                                                                  | 3.73           |
|                                                       | 313      | 35.2                             | 1.85         | 0.0203           | 2.70                                                                  | 4.18           |
|                                                       | 330      | 34.2                             | 1.93         | 0.0131           | 4.05                                                                  | 4.55           |
|                                                       | 348      | 33.6                             | 1.99         | 0.0083           | 5.91                                                                  | 5.19           |
|                                                       | 363      | 32.9                             | 2.06         | 0.0058           | 7.99                                                                  | 5.73           |
| [C <sub>4</sub> C <sub>1</sub> Im][Tf <sub>2</sub> N] | 298      | 32.6                             | 1.87         | 0.0523           | 1.09                                                                  | 3.83           |
|                                                       | 313      | 31.9                             | 1.94         | 0.0275           | 1.73                                                                  | 4.82           |
|                                                       | 330      | 30.8                             | 2.03         | 0.0168           | 2.68                                                                  | 5.37           |
|                                                       | 348      | 30.4                             | 2.10         | 0.0098           | 3.87                                                                  | 6.72           |
|                                                       | 363      | 29.1                             | 2.19         | 0.0065           | 5.73                                                                  | 7.13           |
| [C <sub>8</sub> C <sub>1</sub> Im][Tf <sub>2</sub> N] | 298      | 29.8                             | 1.96         | 0.0955           | 0.68                                                                  | 3.34           |
|                                                       | 313      | 29.2                             | 2.03         | 0.0459           | 1.50                                                                  | 3.33           |
|                                                       | 330      | 28.2                             | 2.12         | 0.0258           | 1.89                                                                  | 4.95           |
|                                                       | 348      | 27.3                             | 2.21         | 0.0134           | 3.44                                                                  | 5.53           |
|                                                       | 363      | 26.8                             | 2.28         | 0.0085           | 4.55                                                                  | 6.87           |
| [C <sub>4</sub> C <sub>1</sub> Im][PF <sub>6</sub> ]  | 298      | 45.9                             | 1.58         | 0.2448           | 0.26                                                                  | 3.47           |
|                                                       | 313      | 44.7                             | 1.64         | 0.1061           | 0.60                                                                  | 3.63           |
|                                                       | 330      | 43.4                             | 1.71         | 0.0532           | 1.06                                                                  | 4.28           |
|                                                       | 348      | 42.0                             | 1.79         | 0.0255           | 1.99                                                                  | 5.02           |
|                                                       | 363      | 40.8                             | 1.85         | 0.0146           | 3.12                                                                  | 5.82           |
| [C <sub>8</sub> C <sub>1</sub> Im][PF <sub>6</sub> ]  | 298      | 35.3                             | 1.80         | 0.7032           | 0.09                                                                  | 3.56           |
|                                                       | 313      | 34.4                             | 1.87         | 0.2632           | 0.20                                                                  | 4.33           |
|                                                       | 330      | 33.3                             | 1.95         | 0.1008           | 0.45                                                                  | 5.30           |
|                                                       | 348      | 32.1                             | 2.04         | 0.0395           | 0.88                                                                  | 7.31           |
|                                                       | 363      | 31.2                             | 2.11         | 0.0194           | 1.47                                                                  | 9.29           |
